# Supplementary material
Source: MDPI journal article supplement (https://www.mdpi.com/2078-2489/8/3/101)
Supplement: s1 [file s1]

## Modification list

| No | Description                                                                                                                                                                         |
|----|-------------------------------------------------------------------------------------------------------------------------------------------------------------------------------------|
| 1  | Add the telephone number                                                                                                                                                            |
| 2  | Add the sentence 'All included studies were evaluated on the basis of the 8 criteria listed in Table 1.' above the table 1.                                                         |
| 3  | Renumber the references through NoteExpress and renumber reference list (reference 20-35), but <b>I am not sure that such modification conforms to the publication requirement.</b> |
| 4  | Add a line in Table 2, ( <b>last row, I am not sure that it is necessary</b> )                                                                                                      |
| 5  | Modify Italic n in figure 1;<br>Add space before and after = in figure 1.                                                                                                           |
